# Supplementary material for: A database on the stability of silver and gold nanostructures for applications in biology and biomolecular sciences
Source: Royal Society of Chemistry journal article supplement (doi:10.1039/c6bm00629a), 2016-11-08

## HOW TO USE THE DATABASE

If you are at this stage, you have already downloaded successfully the ZIP file.

*If you are looking at this without actually extracting from the ZIP file, it will not work.*

You must extract (or expand the file) and then click on the icon:

[Click here to start.html](#)

This is frequently named “index” and has been renamed for your convenience.

The table should open.

Click in any corner with a color triangle (▼) and the stability data should open in a super imposed window.

**Table 2: Nanoparticle Stability ( $t_{0.8Abs}$ ) in Various Biological Buffer Solutions and Growth Media.**

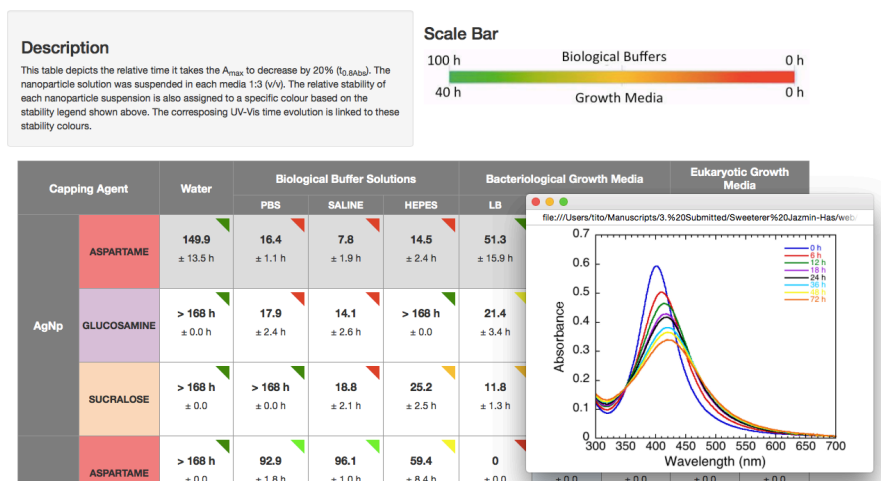

Supplement: c6bm00629a1.zip [file c6bm00629a1.zip]
